# Supplementary figures and images for: Iron-dependent turnover of IRP-1/c-aconitase in kidney cells
Source: Royal Society of Chemistry journal article supplement (doi:10.1039/c4mt00315b), 2015-01-01

Suppl. Fig. 1

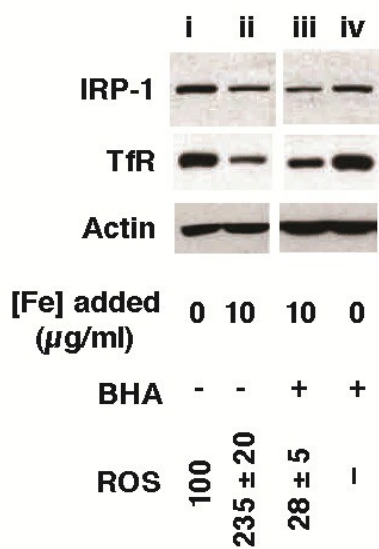

Supplement: c4mt00315b1.pdf [file c4mt00315b1.pdf]
